# Supplementary material for: The effects of SO 2 impurities on CO 2 electroreduction on bare silver and SiO 2 coated silver in different cell geometries
Source: Royal Society of Chemistry journal article supplement (doi:10.1039/d4cy01196a), 2025-01-01
Supplement: d4cy01196a1.pdf [file d4cy01196a1.pdf]

# Supporting information

## The effects of SO<sub>2</sub> impurities on CO<sub>2</sub> electroreduction on bare silver and SiO<sub>2</sub> coated silver in different cell geometries

Ming Li, <sup>\*a</sup> Shilong Fu,<sup>b</sup> Ruud Kortlever<sup>b</sup> and J.Ruud van Ommen <sup>\*a</sup>

### Table of contents

|                                                                                                                  |   |
|------------------------------------------------------------------------------------------------------------------|---|
| Figure S1. TG/DTA analysis of the original Ag/CB catalyst.....                                                   | 2 |
| Figure S2. Growth per ALD cycle of SiO <sub>2</sub> deposition and Si 2p XPS spectra of the Ag/CB catalyst. .... | 2 |
| Figure S3. Pure Ag nanoparticles FE .....                                                                        | 3 |
| Figure S4. Cyclic voltammetry tests under various gas supplies.....                                              | 3 |
| Figure S5. XPS area scan of the Ag/CB catalyst tested at H-cell. ....                                            | 4 |
| Method to calculate the SO <sub>2</sub> concentration required to get SO <sub>2</sub> reduction.....             | 5 |
| Figure S6. CV testing.....                                                                                       | 5 |
| Figure S7. A visual representation of both cell geometries.....                                                  | 6 |
| Figure S8. Faradaic efficiency of the original Ag/CB catalyst tested at MEA.....                                 | 6 |
| Figure S9. Salt formation after 50 minutes CP testing.....                                                       | 7 |
| Figure S10. CP testing of the uncoated Ag/CB catalyst with pure CO <sub>2</sub> gas feed.....                    | 7 |
| Table S1. ALD experimental conditions .....                                                                      | 8 |
| Table S2. Gas recipes for H-cell testing and MEA testing. ....                                                   | 8 |

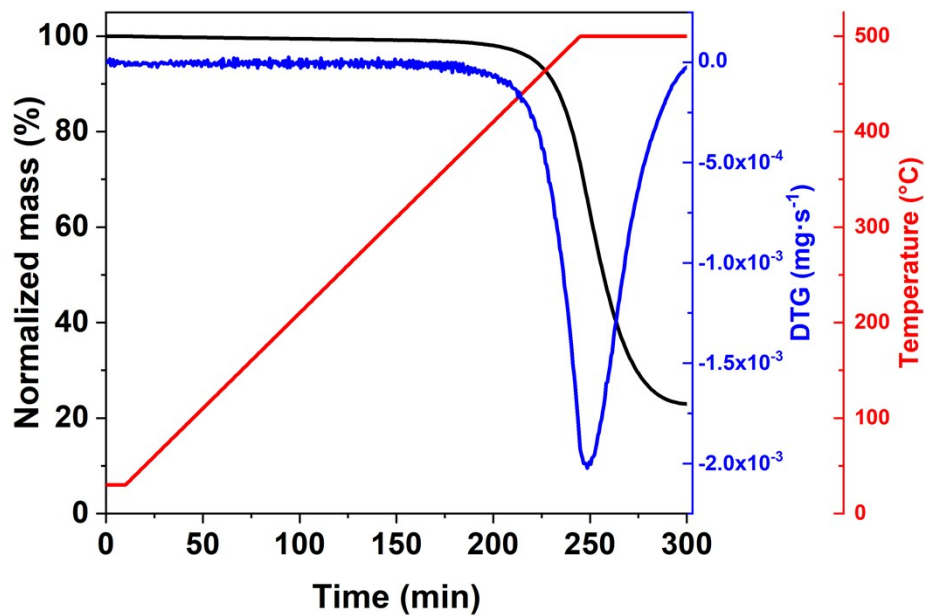

Figure S1. TG/DTA analysis of the original Ag/CB catalyst.

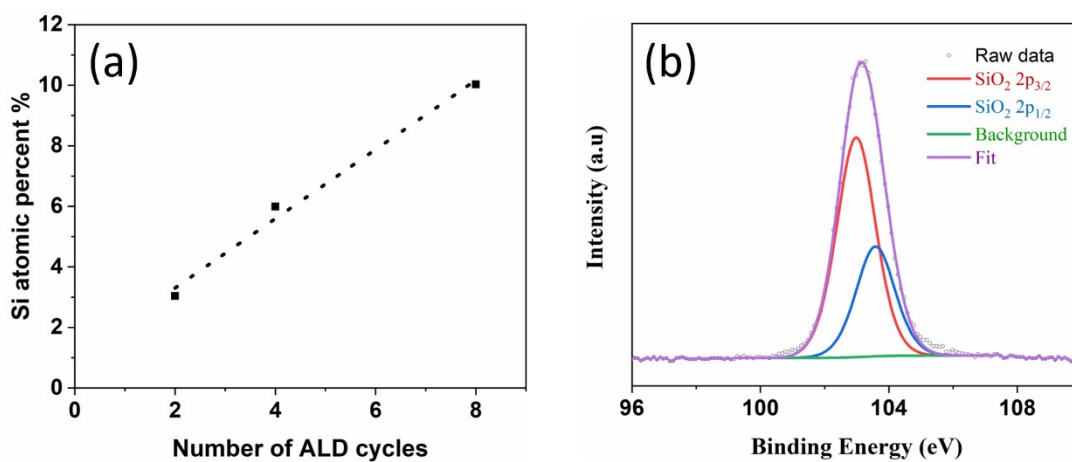

Figure S2. (a) Growth per ALD cycle of SiO<sub>2</sub> deposition on the surface of Ag/CB catalyst. (b) Si 2p XPS spectra of the Ag/CB catalyst with 8 cycles of SiO<sub>2</sub> coating.

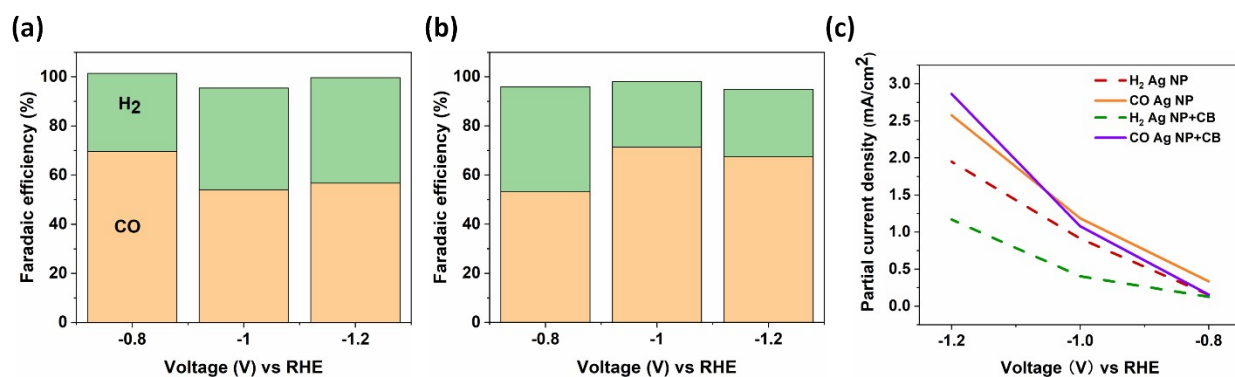

Figure S3. (a) Pure Ag nanoparticles drop casted on glassy carbon electrode tested at H-cell. (b) Ag nanoparticles mixed with carbon black to mimic the Ag/CB catalyst drop casted on glassy carbon electrode tested at H-cell. (c) Partial current density of CO and H<sub>2</sub> from pure Ag nanoparticles and Ag nanoparticles mixed with carbon black.

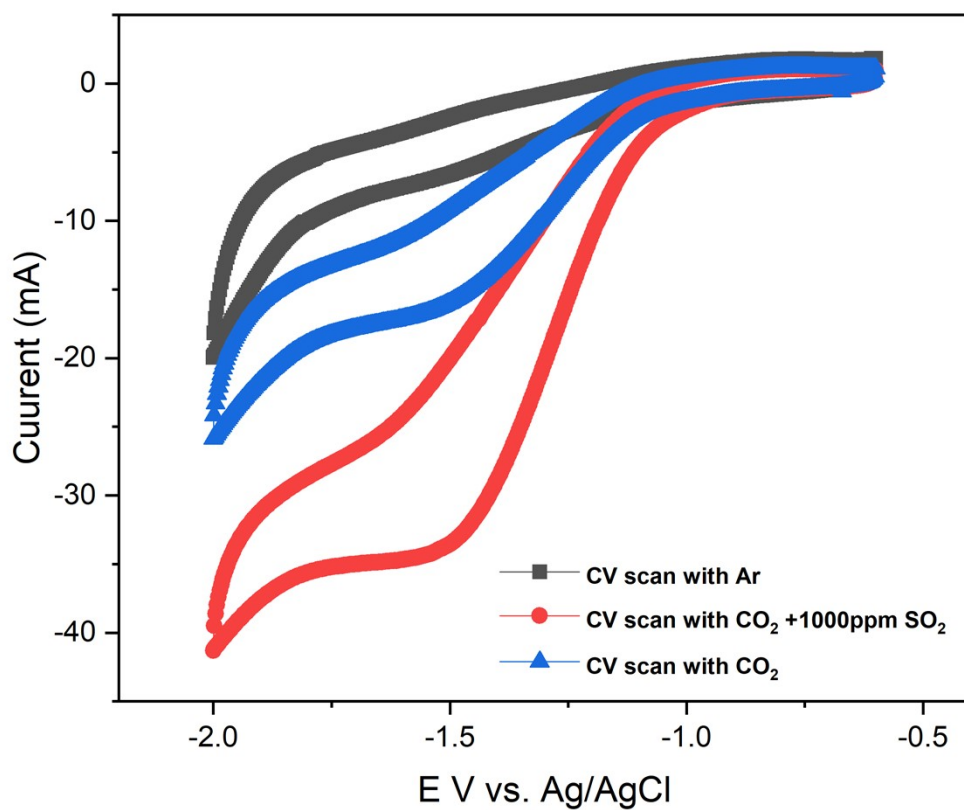

Figure S4. Cyclic voltammetry tests under various gas supplies: pure Ar, CO<sub>2</sub> with 1000ppm SO<sub>2</sub> and pure CO<sub>2</sub>

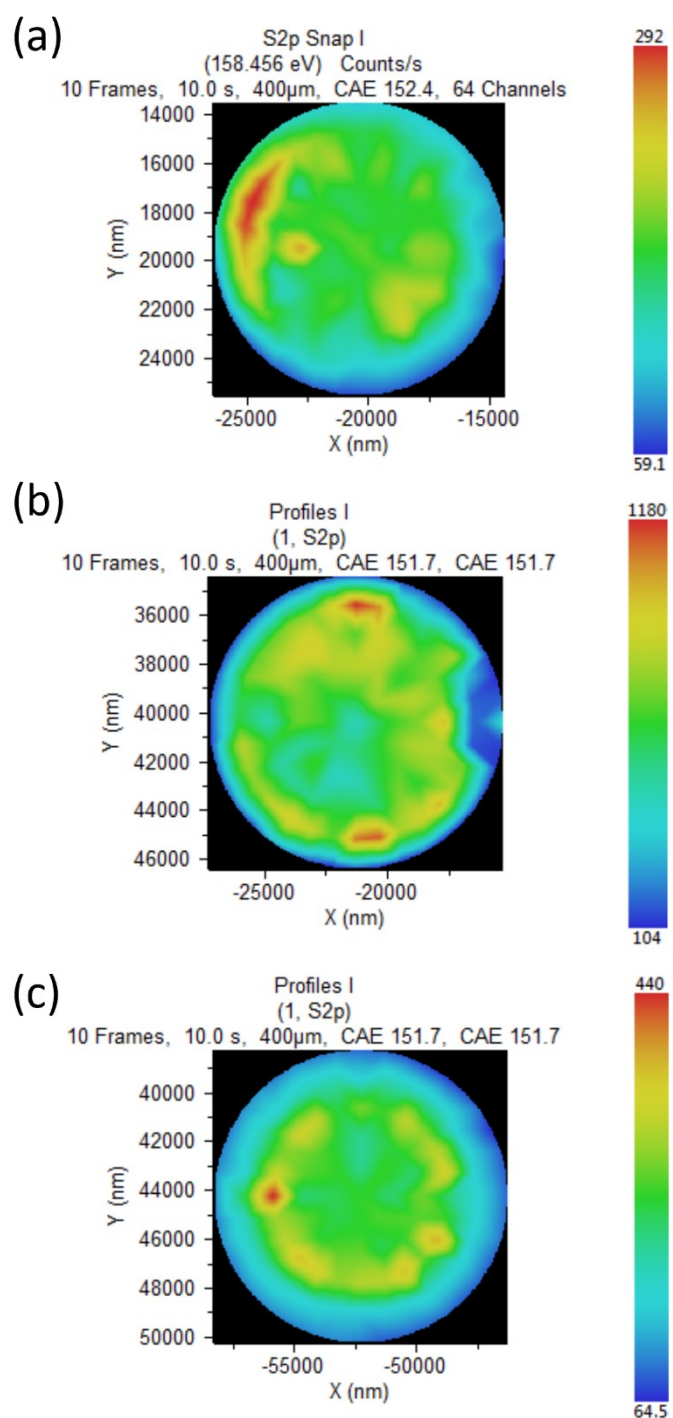

Figure S5. XPS area scan of the Ag/CB catalyst tested at H-cell. (a) uncoated Ag/CB catalyst after 1h CO<sub>2</sub> electrolysis at H-cell with pure CO<sub>2</sub>. (b) uncoated Ag/CB catalyst after 1h CO<sub>2</sub> electrolysis at H-cell with 1000 ppm SO<sub>2</sub>. (c) 8 cycles SiO<sub>2</sub> coated Ag/CB catalyst after 1h CO<sub>2</sub> electrolysis at H-cell with 1000 ppm SO<sub>2</sub>.

Method to calculate the SO<sub>2</sub> concentration required to get SO<sub>2</sub> reduction

$$FE_{missing} = FE_{in\ total\ (Ag/CB\ with\ pure\ CO_2\ feed)} - FE_{in\ total\ (Ag/CB\ with\ CO_2 + SO_2\ feed)}$$

$$FE_{in\ total} = FE_{H_2} + FE_{CO}$$

$$I_{missing} = FE_{missing} \times I_{in\ total}$$

$$I_{SO_2\ RR\ partial\ current} = I_{missing}$$

$$Required\ flow\ rate_{SO_2} = \frac{I_{SO_2\ RR\ partial\ current} \times 6.242 \times 10^{18}}{N_{number\ of\ electrons} \times N_A} \times V_{25^\circ C}$$

$$V_{25^\circ C} = \frac{nRT_{25^\circ C}}{P} = 24.465L/mol$$

$$N_A = 6.02 \times 10^{23} mol^{-1}$$

$$N_{number\ of\ electrons} = 6$$

$$Required\ C_{concentration\ SO_2} = \frac{Required\ flow\ rate_{SO_2}}{Flow\ rate_{in\ total}} \times 100\% \times \frac{1 \times 10^6\ ppm}{\%}$$

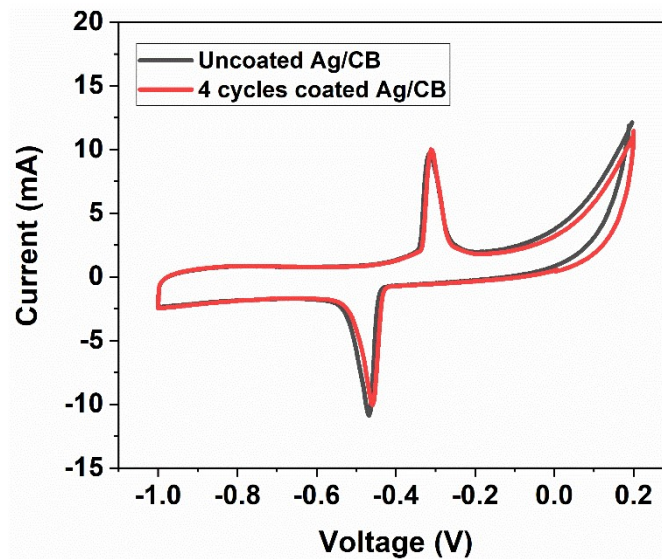

Figure S6. CV testing of the uncoated Ag/CB catalyst and the catalyst with 4 cycles of SiO<sub>2</sub> coating, tested at MEA reactor.



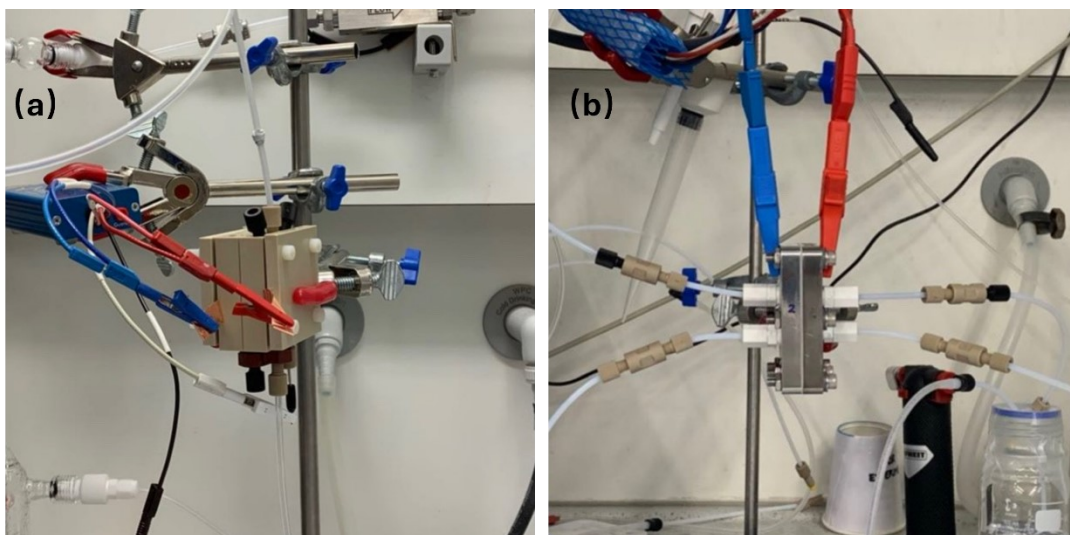

Figure S7. A visual representation of both cell geometries. (a) H-cell (b) MEA

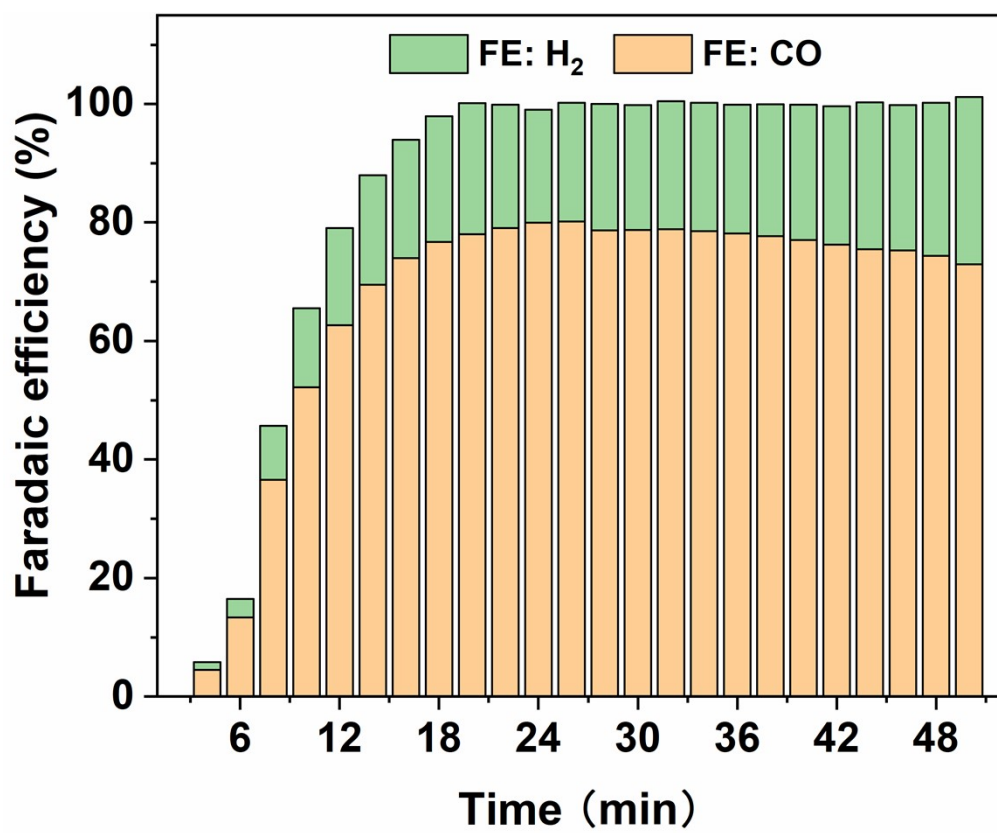

Figure S8. Faradaic efficiency of the original Ag/CB catalyst tested at MEA reactor at 100 mA/cm<sup>2</sup> current density in a 1 M KHCO<sub>3</sub> electrolyte with pure CO<sub>2</sub> feed for 50 minutes.



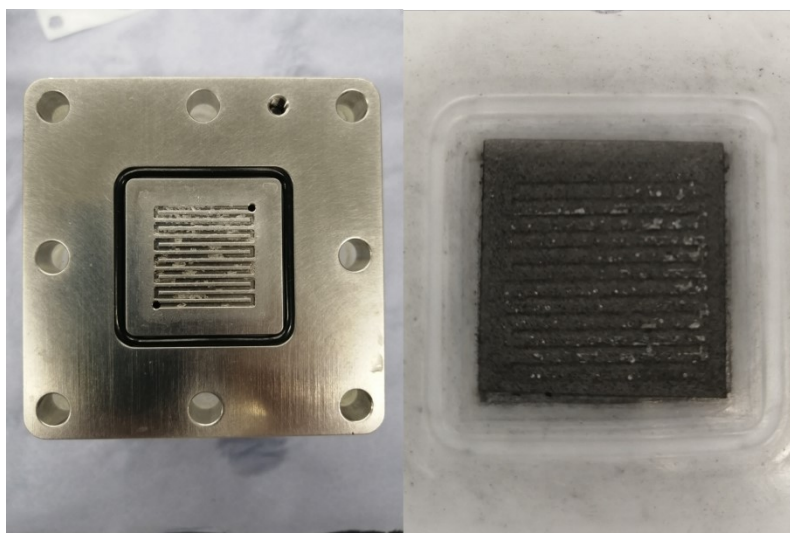

Figure S9. Salt formation after 50 minutes CP testing of the uncoated Ag/CB catalyst at  $100 \text{ mA/cm}^2$ .

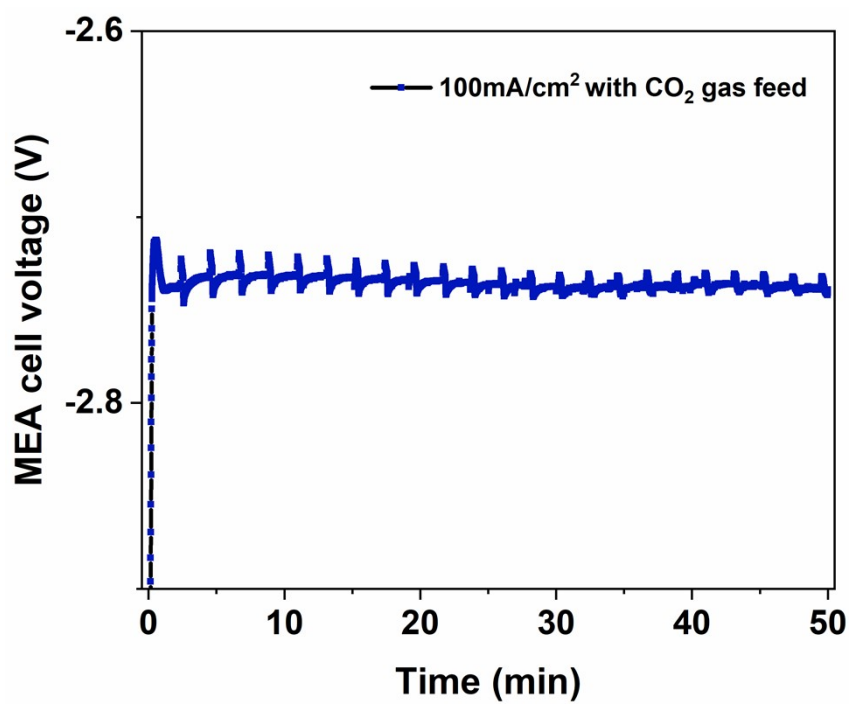

Figure S10. CP testing of the uncoated Ag/CB catalyst with pure  $\text{CO}_2$  gas feed at  $100 \text{ mA/cm}^2$ .

Table S1. ALD experimental conditions. (RT indicates room temperature)

| Material         | Reactant<br>(T,°C)     | Co-reactant<br>(T,°C)          | Type of reactor           | T <sub>reaction</sub><br>(°C) | Pulse and<br>Purge Time (s)<br>(SiCl <sub>4</sub> -N <sub>2</sub> -H <sub>2</sub> O-<br>N <sub>2</sub> ) | Flow<br>rate(L/min) |
|------------------|------------------------|--------------------------------|---------------------------|-------------------------------|----------------------------------------------------------------------------------------------------------|---------------------|
| SiO <sub>2</sub> | SiCl <sub>4</sub> (RT) | H <sub>2</sub> O vapor<br>(RT) | Flat substrate<br>reactor | 100                           | 15-60-30-60                                                                                              | 0.5-0.5-0.5-<br>0.5 |
| SiO <sub>2</sub> | SiCl <sub>4</sub> (RT) | H <sub>2</sub> O vapor<br>(RT) | Fluidized bed<br>reactor  | 100                           | 60-150-60-150                                                                                            | 0.5-2-2-2           |

Table S2. Gas recipes for H-cell testing and MEA testing

| Gas composition                            | Types of<br>reactors | Gas flow rate (sccm) |                                              |                                                |
|--------------------------------------------|----------------------|----------------------|----------------------------------------------|------------------------------------------------|
|                                            |                      | CO <sub>2</sub>      | CO <sub>2</sub> + 100 ppm<br>SO <sub>2</sub> | CO <sub>2</sub> + 10000<br>ppm SO <sub>2</sub> |
| CO <sub>2</sub>                            | H-cell               | 8                    | 0                                            | 0                                              |
| CO <sub>2</sub> + 10 ppm SO <sub>2</sub>   | H-cell               | 7.2                  | 0                                            | 0.8                                            |
| CO <sub>2</sub> + 100 ppm SO <sub>2</sub>  | H-cell               | 0                    | 8                                            | 0                                              |
| CO <sub>2</sub> + 1000 ppm SO <sub>2</sub> | H-cell               | 7.2                  | 0                                            | 0.8                                            |
| CO <sub>2</sub>                            | MEA cell             | 20                   | 0                                            | 0                                              |
| CO <sub>2</sub> + 1000 ppm SO <sub>2</sub> | MEA cell             | 18                   | 0                                            | 2                                              |
